# Supplementary material for: Conversion of (Z)-1,4-dihydroxyalk-2-enes into 2,5-dihydrofurans and of alkane-1,4-diols into tetrahydrofurans via acid-catalysed cyclisation of the monoisoureas formed by their copper(i)-mediated reactions with dicyclohexylcarbodiimideElectronic supplementary information (ESI) available. Experimental data for compounds 14a–f, 15a–f, 7a–f, 22a–g, 21a–e and 2b–e: See http://www.rsc.org/suppdata/p1/b2/b203389p/
Source: Royal Society of Chemistry journal article supplement (doi:10.1039/b203389p), 2002-06-10
Supplement: b203389p.doc [file b203389p.doc]

**Supplementary** **data**

**Conversion of (*Z*)-1,4-Dihydroxyalk-2-enes into 2,5-Dihydrofurans and of 1,4-Alkanediols intoTetrahydrofurans *via* Acid-catalysed Cyclisation of the Monoisoureas Formed by their Copper(I)-mediated Reactions with Dicyclohexylcarbodiimide**

Michael G. Duffy and David H. Grayson**a*

*University Chemical Laboratory, Trinity College, Dublin 2, Ireland.*

**Methyl 5-hydroxy-8-(tetrahydropyran-2’-yloxy)oct-6-yneoate 14a:** from 3-(tetrahydropyran-2’-yloxy)propyne and methyl 5-oxopentanoate;an *oil* (2.24 g; 83%), max (L) 3430, 2947, 1737, 1345, 1202, 1188, 1078, 1055, 1024, 902, 871 and 805 cm-1; H (300 MHz) 1.54 (4H, m, C*H2*groups), 1.75 (6H, m, C*H2* groups), 2.35 (3H, t, *J* 7.0, C*H2*CO2), 2.50 (1H, br s, exch. D2O, O*H*), 3.67 (3H, s, CO2C*H3*), 3.7 (2H, 6’-C*H2*), 4.26 (2H, m, HOC*H2*CC), 4.40 (1H, m, C*H*OH) and 4.78 (1H, m, 2’-*H*) ppm.

**Methyl 6-hydroxy-9-(tetrahydropyran-2’-yloxy)non-7-yneoate 14b:** from 3-(tetrahydropyran-2’-yloxy)propyneand methyl 5-oxohexanoate; an *oil* ( 2.43 g; 86%), b.p. 168-170 oC (0.5mm Hg), max (L) 3427, 1739 and 1024 cm-1; H (80 MHz) 1.4 (12H, m, C*H2* groups), 2.25 (3H, t, *J* 6.0, C*H2*CO2), 2.3 (1H, br s, exch. D2O, O*H*), 3.65 (3H, s, CO2C*H*3), 3.7 (2H, m, 6’-C*H2*), 4.29 (2H, Abq, *Jgem* 15.1, HOC*H2*CC), 4.40 (1H, m, C*H*OH) and 4.77 (1H, m, 2’-C*H*) ppm.

**Methyl 4-hydroxy-1-(tetrahydropyran-2’-yloxy)dec-2-yneoate 14c:** from 3-(tetrahydropyran-2’-yloxy)propyneand methyl 5-oxoheptanoate; an *oil* (2.72 g; 87%), max (L) 3442, 1738 and 1024 cm-1; H (400 MHz) 1.3-1.85 (14H, m, C*H2* groups), 2.32 (2H, t, *J* 7.3, C*H2*CO2), 2.40 (1H, br s, exch. D2O, O*H*), 3.53 (1H, m, 6’-C*Ha*), 3.66 (3H, s, CO2C*H3*), 3.83 (1H, m, 6’-C*Hb*), 4.25 (2H, Abq, *Jgem* 15.4, HOC*H2*CC), 4.4 (1H, m, C*H*OH) and 4.81 (1H, m, 2’-C*H*) ppm.

**Methyl 8-hydroxy-11-(tetrahydropyran-2’-yloxy)undec-9-yneoate 14d:** from 3-(tetrahydropyran-2’-yloxy)propyneand methyl 5-oxooctanoate; an *oil* (2.26 g; 73%), b.p. 221-224 oC (0.5mm Hg), max (L) 3443, 1737 and 1024 cm-1; H (80 MHz) 1.3-1.7 (16H, m, C*H2* groups), 2.35 (2H, t, *J* 8.0, C*H2*CO2), 2.65 (1H, br s, exch. D2O, O*H*), 3.55 (1H, m, 6’-C*H*a), 3.65 (3H, s, CO2C*H3*), 3.82 (1H, m, 6’-*H*b), 4.28 (2H, Abq, *Jgem* 15.2, HOC*H­2*CC), 4.45 (1H, m, C*H*OH) and 4.80 (1H, m, 2’-C*H*) ppm.

**Methyl 9-hydroxy-12-(tetrahydropyran-2’-yloxy)dodec-10-yneoate 14e:** from 3-(tetrahydropyran-2’-yloxy)propyneand methyl 5-oxononanoate; an *oil* (1.92 g: 62%), max (L) 3447, 1737 and 1025 cm-1; H (400 MHz) 1.18-1.36 (6H, m, C*H2* groups), 1.42-1.71 (4H, m, C*H2* groups), 2.02 (1H, br s, exch. D2O, O*H*), 2.22 (2H, t, *J* 7.5, C*H2*CO2), 3.45 (1H, m, 6’-C*Ha*), 3.59 (3H, s, CO2C*H3*), 3.76 (1H, m, 6’-C*Hb*), 4.22 (2H, Abq, *Jgem* 15.6, HOC*H2*CC), 4.32 (1H, m, C*H*OH) and 4.73 (1H, m, 2’-C*H*) ppm.

**Methyl 10-hydroxy-13-(tetrahydropyran-2’-yloxy)tridec-11-yneoate 14f:** from 3-(tetrahydropyran-2’-yloxy)propyneand methyl 5-oxodecanoate; an *oil* (2.19 g; 70%), b.p. 195-198 oC (0.5mm Hg). max (L) 3417, 1743 and 1024 cm-1; H (80 MHz) 1.29-1.87 (20H, m, C*H2* groups), 2.15 (2H, t, *J* 7.0, C*H2*CO2), 2.30 (1H, br s, exch. D2O, O*H*), 3.58 (1H, m, 6’-*Ha*), 3.65 (3H, s, CO2C*H3*), 3.87 (1H, m, 6’-*Hb*), 4.29 (2H, Abq, *Jgem* 15.2, HOC*H­2*CC), 4.40 (1H, m, C*H*OH) and 4.85 (1H, m, 2’-*H*) ppm.

**Methyl 5,8-dihydroxyoct-6-yneoate 15a:** from **14a** as an *oil* (0.72 g; 71%), max  (L) 3404, 1734 and 1022 cm-1; H  (300 MHz) 1.75 (4H, m, C*H2* groups), 2.37 (2H, t, *J* 6.9, C*H2*CO2), 3.07 (2H, br s, exch. D2O, O*H* groups), 3.67 (3H, s, CO2C*H3*), 4.26 (2H, d, *J* 1.7, C*H2*OH) and 4.40 (1H, m, C*H*OH) ppm. [*Found:* C 57.94, H 7.32 %; C9H14O4 *requires* C 58.06, H 7.52 %]

**Methyl 6,9-dihydroxynon-7-yneoate 15b:** from **14b** as an *oil*(0.83 g; 83%), max (L) 3407, 1734 and 1039 cm-1; H (80 MHz) 1.4 (6H, m, C*H2* groups), 2.3 (2H, t, *J* 7.8, C*H2*CO2), 3.25 (2H, br s, exch. D2O, O*H* groups), 3.60 (3H, s, CO2C*H3*), 4.31 (2H, d, *J* 1.5, C*H2*OH) and 4.40 (1H, m, C*H*OH) ppm.

[*Found:* C 59.87, H 7.85 %; C10H16O4 *requires* C 60.00, H 8.00 %]

**Methyl 7,10-dihydroxydec-8-yneoate 15c:** from **14c** as an *oil*  (0.99g; 93%), max (L) 3408, 1736 and 1021 cm-1; H (400 MHz) 1.36 (2H, m C*H2*), 1.48 (2H, m, C*H2* group), 1.68 (4H, m, C*H2* groups), 2.30 (2H, t, *J* 7.4, C*H2*CO2), 3.22 (2H, br s, exch. D2O, O*H* groups), 3.67 (3H, s, CO2C*H3*), 4.25 (2H, d, *J* 1.5, C*H2*OH) and 4.4 (1H, m, C*H*OH) ppm.

[*Found:* C 61.59, H 8.22 %; C11H18O4 *requires* C 61.68, H 8.41 %]

**Methyl 8,11-dihydroxyundec-9-yneoate 15d:** from **14d** asan *oil* (1.04 g; 82%), max (L) 3412, 1739 and 1028 cm-1; H (80 MHz) 1.45 (10H, m, C*H2* groups), 2.25 (2H, t, *J* 7.6, C*H2*CO2), 3.00 (2H, br s, exch. D2O, O*H* groups), 3.70 (3H, s, CO2C*H3*) and 4.35 (3H, m, C*H2*OH and C*H*OH) ppm.

[*Found:* C 62.78, H 8.56 %; C12H20O4 *requires* C 63.15, H 8.77 %]

**Methyl 9,12-dihydroxydodec-10-yneoate 15e:** from **14e** as an *oil* (2.1 g; 87%), max (L) 3402, 1737 and 1021 cm-1; H (400 MHz) 1.19-1.37 (8H, m, C*H2* groups), 1.55 (2H, m, C*H2*), 1.6 (2H, m, C*H2*), 2.30 (2H, t, *J* 8.0, CH*2*CO2), 2.45 (2H, br s, exch. D2O, O*H* groups), 3.60 (3H, s, CO2C*H3*), 4.26 (2H, br s, C*H2*OH) and 4.33 (1H, t, *J* 6.3, C*H*OH) ppm.

[*Found:* C 64.24, H 8.95 %; C13H22O4 *requires* C 64.46, H 9.09 %]

**Methyl 10,13-dihydroxytridec-11-yneoate 15f:** from **14f** as an *oil* (0.92 g; 76%), max (L) 3397, 1744 and 1036 cm-1; H (400 MHz) 1.14-1.49 (10H, C*H2* groups),1.61 (2H, m, C*H2*), 1.74 (2H, m, C*H2*), 2.35 (4H, including O*H* groups [exch. D2O] and t, *J* 7.9, C*H2*CO2), 3.65 (3H, s, CO2C*H3*), 4.21 (2H, br s, HOC*H­2*) and 4.4 0(1H, m, C*H*OH) ppm.

[*Found:* C 65.38, H 9.19 %; C14H24O4 *requires* C 65.62, H 9.37 %]

**Methyl (Z)-5,8-dihydroxyoct-6-eneoate 7a:** from **15a** as an *oil* (0.81 g; 86%), b.p. 160-162 0C (0.5mm Hg), max  (L) 3386, 1736 and 1037 cm-1; H (300 MHz) 1.63 (4H, m, C*H2* groups), 2.31 (2H, t, *J* 6.8, C*H2*CO2), 3.44 (2H, br s, exch. D2O, O*H* groups), 3.64 (3H, s, CO2C*H3*), 4.04 (1H, dd, *J* 12.8 and 5.7, C*Ha*OH) 4.25 (1H, dd, *J*12.8 and 7.5, C*Hb*OH), 4.28 (1H, apparent q,*J* 7.5, C*H*OH), 5.49 (1H, dd, *J* 9.5 and 8.4, 6-*H*) and 5.64 (1H, m, 7-*H*) ppm; C (75.5 MHz) 174.3 (*C*=O), 134.7 and 130.2 (-*C*=*C*-), 66.9 (*C*HOH), 58.1 (*C*H2OH), 51.6 (CO2*C*H3), 36.4 (*C*H2CO2), 33.7 (2-*C*H2) and 20.6 (*C*H2) ppm.

[*Found:* C 57.19, H 8.37 %; C9H16O4 *requires* C 57.44, H 8.51 %]

**Methyl (Z)-6,9-dihydroxynon-7-eneoate 7b:**from **15b** as an *oil* (0.76 g; 75%), b.p. 153-155 oC (0.5mm Hg), max (L) 3368, 1736 and 1019 cm-1; H (300 MHz) 1.21-1.52 (4H, m, C*H2* groups), 1.65 (2H, m, C*H2*), 2.29 (2H, t, *J* 7.3, C*H2*CO2), 3.43 (2H, br s, exch. D2O, O*H* groups), 3.63 (3H, s, CO2C*H3*), 4.08 (1H, dd, *J* 12.8 and 5.5, C*Ha*OH), 4.18 (1H, dd, *J*12.8 and 7.8 *CHbOH*), 4.42 (1H, apparent q, *J* 7.0, C*H*OH), 5.50 (1H, dd, *J* 9.7 and 8.4, 7-*H*) and 5.70 (1H, m, 8’-*H*) ppm.

[*Found*: C 59.27, H 9.19 %; C10H18O4 *requires* C 59.40, H 8.91 %]

**Methyl (Z)-7,10-dihydroxydec-8-eneoate 7c:**from **15c** asan *oil* (0.95 g; 88%), b.p. 194-196 0C (0.5mm Hg), max (L) 3363, 1737 and 1014 cm-1; H (400 MHz) 1.2 (4H, m, C*H2* groups), 1.54 (4H, m, C*H2* groups), 2.24 (2H, t, *J* 7.5, C*H2*CO2), 2.8 (2H, br s, exch. D2O, O*H* groups), 3.60 (3H, s, CO2C*H3*), 4.02 (1H, dd, *J* 12.9 and 5.6, 10-C*Ha*OH), 4.22 (1H, ddd, *J* 12.9, 7.6, and 1.1, 10-C*Hb*OH), 4.34 (1H, apparent q, *J* 7.3, C*H*OH), 5.47 (1H, dd, *J* 9.6 and 8.4, 8-*H*) and 5.66 (1H, m, 9-*H*) ppm; C(100.6 MHz) 174.3 (*C*=O), 130 and 135 (-*C*=*C*-), 67.3 (*C*HOC), 58.2 (*C*H2OC), 51.5 (CO2*C*H3), 36.8 (*C*H2CO2), 33.8 (*C*H2), 28.8 (*C*H2), 24.8 (*C*H2) and 24.7 (*C*H2) ppm; *m/z*(CI):217.1440: *calculated for* [C11H20O4 + H]+ 217.1440.

**(Z)-Methyl 8,11-dihydroxyundec-9-eneoate****7d:** from **15d** asan *oil* (1.04 g; 91%), b.p. 160-162 oC (0.5mm Hg). max (L) 3377, 1741 and 1020 cm-1; H (300 MHz) 1.32 (6H, m, C*H2* groups), 1.6 (4H, m, C*H2* groups), 2.3 (2H, t, *J* 7.5, C*H2*CO2), 3.0 (2H, br s, exch. D2O, O*H* groups), 3.66 (3H, s, CO2C*H3*), 4.11 (1H, dd, *J*12.9 and 4.8, C*Ha*OH), 4.32 (1H, ddd, *J* 12.9, 6.8 and 1.3, C*Hb*OH) 4.65 (1H, apparent q, *J* 6.0, C*H*OH), 5.55 (1H, dd, *J* 9.5 and 8.2, 9-*H*) and 5.72 (1H, m, 8-*H*) ppm.

[*Found* : C 62.34, H 9.45 %; C12H22O4 *requires* C 62.61, H 9.56 %]

**Methyl (Z)-9,12-dihydroxydodec-10-eneoate 7e:** from **15e** as an *oil* (0.96 g; 79%), max (L) 3375, 1737 and 1021 cm-1; H (400 MHz) 1.28 (6H, m, C*H2* groups), 1.6 (4H, m, C*H2* groups), 2.11 (2H, s, exch. D2O, O*H* groups), 2.30 (2H, t, *J* 7.5, C*H2*CO2Me), 3.66 (3H, s, CO2C*H3*), 4.03 (1H, dd, *J* 12.9 and 5.3, C*Ha*OH), 4.29 (1H, dd, *J*12.8 and 8.1, C*Hb*OH), 4.39 (1H, apparent q, *J* 6.9, C*H*OH), 5.51 (1H, apparent t, *J* 10.0, 10-*H*) and 5.69 (1H, m, 11s-*H*) ppm; C (100.6 MHz) 174.3 (*C*=O), 135.2 and 130.2 (-*C*=*C*-), 67.7 (8-*C*H), 58.6 (10-*C*H2), 37.3 (*C*H2), 34.0 (*C*H2), 29.2 (*C*H2), 29.0 (*C*H2), 28.9 (*C*H2), 25.1 (*C*H2), and 24.8 (*C*H2) ppm; *m/z* (CI): 245.1758: *calculated for* [C9H14O3 + H]+ 245.1753.

**Methyl (Z)-10,13-dihydroxytridec-11-eneoate****7f:** from **15f** as an *oil* (1.11 g; 91%), max (L) 3387, 1744 and 1014cm-1; H (300 MHz) 1.27 (12H, m, C*H2* groups), 1.60 (2H, m, C*H2*), 2.35 (2H, t, *J* 8.0, C*H2*CO2), 2.56 (2H, br s, exch. D2O, O*H* groups), 3.67 (3H, s, CO2C*H3*), 4.03 (1H, dd, *J* 12.6 and 5.1, C*Ha*OH), 4.28 (1H, dd, *J*12.3 and 6.9, C*Hb*OH), 4.38 (2H, apparent q, *J* 7.5, C*H*OH), 5.46 (1H, apparent t, *J 8.4*, 11-*H*) and 5.68 (1H, m, 12-*H*) ppm.

[*Found* : C 64.96, H 9.85 %; C14H26O4 *requires* C 65.11, H 10.07 %]

**4-Hydroxy-1-(tetrahydropyran-2’-yloxy)dec-2-yne****22a:** from 3-(tetrahydropyran-2’-yloxy)propyneand heptanal; an *oil* (2.24 g; 88%), max (L) 3422, 1074, 1054 and 1024 cm-1; H (80 MHz) 0.9 (3H, t, *J* 5.5, C*H3*)*,* 1.21-1.47 (10H, m, C*H2* groups), 1.64-1.75 (6H, m, C*H2* groups), 2.25 (1H, br s, exch. D2O, O*H*), 3.75 (1H, m, 6’-*Ha*), 3.85 (1H, m, 6’-*Hb*), 4.26 (2H, m, HOC*H2*CC), 4.35 (1H, m, C*H*OH) and 4.87 (1H, m, 2’-*H*) ppm.

**4-Hydroxy-1-(tetrahydropyran-2’-yloxy)tridec-2-yne****22b:**from 3-(tetrahydropyran-2’-yloxy)propyneand decanal; an *oil* (2.46 g; 83%), max (L) 3466, 1073 and 1011 cm-1; H (80 MHz) 0.95 (3H, t, *J* 6.0, C*H3*), 1.27-1.56 (14H, m, C*H2* groups), 1.64-1.83 (6H, m, C*H2* groups), 2.35 (1H, br s, exch D2O, O*H*), 3.68 (1H, m, 6’-*Ha*), 3.85 (1H, m, 6’-*Hb*), 4.42 (3H, m, HOC*H2*CC and C*H*OH) and 4.91 (1H, m, 2’-*H*) ppm.

**2-Hydroxy-1-phenyl-5-(tetrahydopyran-2’-yloxy)pent-3-yne 22c:**from 3-(tetrahydropyran-2’-yloxy)propyneand phenylacetaldehyde; an *oil* (2.36 g; 91%), max (L) 3409, 1604, 1117, 1025, 741 and 699 cm-1; H (80 MHz) 1.38-1.65 (6H, m, C*H2* groups), 1.9 (br s, exch. D2O, O*H*), 3.07 (2H, d, *J* 6.0, C*H2*Ph), 3.45 (1H, m, 6’*Ha*), 3.75 (1H, m, 6’-*Hb*), 4.22 (2H, d, *J* 1.5, HOC*H2*CC), 4.54 (1H, m, 2’-*H*), 4.66 (1H, m, C*H*OH) and 7.23 (5H, m, Ar*H*) ppm.

**4-Hydroxy-7-phenyl-1-(tetrahydropyran-2’-yloxy)hex-2-yne 22d:**from 3-(tetrahydropyran-2’-yloxy)propyneand 3-phenylpropanal; an *oil* (2.28 g; 83%), max (L) 3411, 1608, 1023, 748 and 699 cm-1; H (80 MHz) 1.35-1.72 (6H, m, C*H2* groups), 2.05 (2H, m, C*H2*CH2Ph), 2.4 (1H, br s, exch. D2O, CHO*H*), 2.85 (2H, d, *J* 6.2, C*H2*Ph), 3.61 (1H, m, 6’-*Ha*), 3.82 (1H, m, 6’-*Hb*), 4.33 (3H, m, HOC*H2*CC and 2’-*H*), 4.87 (1H, m, C*H*OH) and 7.25 (5H, m, Ar*H*) ppm.

**1-Hydroxy-1-phenyl-4-(tetrahydropyran-2’-yloxy)but-2-yne****22e:**from 3-(tetrahydropyran-2’-yloxy)propyneand benzaldehyde; an *oil* (2.33 g; 95%), max (L) 3401, 1604, 1077, 1055, 1022, 733 and 699 cm-1; H (80MHz) 1.38-1.72 (6H, m, C*H2* groups), 2.36 (1H, br s, exch D2O, CHO*H*), 3.61 (1H, m, 6’-*Ha*), 3.72 (1H, m, 6’-*Hb*), 4.31 (2H, d, *J* 2.0, HOC*H2*CC), 4.85 (1H, s, 2’-C*H*), 5.41 (1H, m, PhC*H*OH) and 7.22-7.56 (5H, m, Ar*H*) ppm.

**1-Hydroxy-1-(2’-methoxyphenyl)-4-(tetrahydropyran-2’’-yloxy)but-2-yne****22f:**from 3-(tetrahydropyran-2’-yloxy)propyneand 2-methoxybenzaldehyde; an *oil* (2.5 g; 91%), max (L) 3413, 1602, 1590, 1054, 1024, 782and755 cm-1; H (80 MHz) 1.41-1.78 (6H, m, C*H2* groups), 2.95 (1H, br s, exch. D2O, O*H*), 3.55 (1H, m, 6‘’-*Ha*), 3.75 (1H, m, 6’’-*Hb*), 3.81 (3H, s, OC*H3*), 4.29 (2H, d, *J* 3.0, HOC*H2*CC), 4.85 (1H, m, 2’’-*H*), 5.75 (1H, br s, C*H*OH), 6.95 (2H, m, Ar*H*), 7.28 (1H, m, Ar*H*) and 7.54 (H, m, Ar*H*) ppm.

**(*E*)-2-Hydroxy-1-phenyl-6-(tetrahydropyran-2’-yloxy)hex-1-en-4-yne****22g:**from 3-(tetrahydropyran-2’-yloxy)propyneand cinnamaldehyde; an *oil* (2.1 g; 80%), max (L) 3402, 1626,1601, 1579, 1076, 1055, 1023, 845, 777and748 cm-1; H (80 MHz) 1.45-1.68 (6H, m, C*H2* groups), 2.28 (1H, br s, exch. D2O, O*H*), 3.53 (1H, m, 6‘-*Ha*), 3.81 (1H, m, 6’-*Hb*), 4.21 (2H, d, *J* 2.6, HOC*H2*CC), 4.87 (1H, m, 2’-*H*), 5.10 (1H, d, *J* 5.5, C*H*OH), 6.36 (1H, dd, *J* 16.5 and 5.5, 3-*H*), 6.76 (1H, d, *J* 16.5, 2-*H*) and 7.31 (5H, m, Ar*H*) ppm.

**1,4-Dihydroxydec-2-yne****21a:** from **22a** as an oil28(0.64 g ;75%), b.p. 119-121 oC (0.5mm Hg), max (L) 3422 and 1034 cm-1; H (80 MHz) 0.9 (3H, t, *J* 6.0, C*H3*), 1.05-1.56 (8H, m, C*H2* groups), 1.58-1.75 (2H, C*H2* group), 3.24 (2H, br s, exch D2O, O*H* groups), 4.25 (2H, m, C*H2*OH) and 4.33 (1H, m, C*H*OH) ppm.

**1,4-Dihydroxytridec-2-y***ne* **21b:** from **22b** asan *oil* (0.85 g; 80%), max (L) 3422, 1077 and 1054 cm-1; H (80 MHz) 0.8 (3H, t, *J* 5.8, C*H3*), 1.14 (14H, m, C*H2* groups), 1.45 (2H, m, C*H2*), 3.3 (2H, br s, exch. D2O, O*H* groups) and 4.35-4.54 (3H, m, C*H2*OH and C*H*OH) ppm; *m/z* (EI): 212.1769: *calculated for* C13H24O2 212.1777.

[*Found:* C 73.37, H 11.53 %; C13H24O2 *requires* C 73.58, H 11.32 %]

**2,5-Dihydroxy-1-phenylpent-3-yne****21c:** from **22c** as an oil29(0.76g; 86%), max (L) 3413, 1605, 1077, 1056, 1025, 741 and 700 cm-1; H (80 MHz) 2.2 (2H, br s, exch. D2O, O*H* groups), 3.0 (2H, d, *J* 6.0, C*H2*Ph), 4.23 (2H, d, *J* 2.0, HOC*H2*CC), 4.6 (1H, dt, *J* 6.1 and 0.9, C*H*OH) and 7.2 (5H, s, Ar*H*) ppm.

**1,4-Dihydroxy-6-phenylhex-2-yne****21d:** from **22d** as an oil30(0.81 g; 85%), max (L) 3334, 1603, 1059, 1016, 751 and 700 cm-1; H (80 MHz) 2.0 (2H, m, C*H2*CH2Ph), 2.4 (2H, br s, exch. D2O, O*H* groups), 2.75 (2H, t, *J* 6.8, C*H2*Ph), 4.28 (2H, d, *J* 1.7, HOC*H2*CC), 4.35 (1H, dt, *J* 6.5 and 0.9, C*H*OH) and 7.25 (5H, m, Ar*H*) ppm.

**1,4-Dihydroxy-1-phenyl-but-2-yne****21e:** from **22e** as needles (0.68 g; 84%), m. p. 82.0-82.3 oC, (*lit.*31 m. p. 83-85 oC), max (N) 3244, 1605, 1074, 1023, 761 and 696 cm-1; H (80 MHz) 1.85 (2H, br s, exch. D2O, O*H* groups), 4.35 (2H, d, *J* 2.0, HOC*H2*CC), 5.5 (1H, t, *J* 1.8, C*H*OH) and 7.45 (5H, m, Ar*H*) ppm.

**(*Z*)-1,4-Dihydroxydec-2-ene****2b:** from **21a** asan oil32(156 mg; 90%), max (L) 3335, 1015 and 722cm-1; H (300 MHz) 0.88 (3H, t, *J* 6.6, C*H3*), 1.2 (8H, m, C*H2* groups), 1.48 (2H, m, C*H2*), 3.59 (2H, br s, exch. D2O, O*H* groups), 4.13 (1H, dd, *J*12.9 and 5.9, HOC*H2a*CC), 4.3 (1H, dd, *J*12.9 and 7.2, HOC*H2b*CC), 4.42 (1H, apparent q, *J* **7**.11, C*H*OH), 5.72 (1H, dd, *J* 9.8 and 8.5, 2-*H*) and 5.85 (1H, m, 3-*H*) ppm; C (100.6 MHz) 135.2 and 129.8 (*C*=*C*), 67.5 (4-*C*), 58.2, (1-*C*), 37.2 (*C*H2), 31.7 (*C*H2), 29.1 (*C*H2), 25.2 (*C*H2), 22.5 (*C*H2) and 13.9 (*C*H3) ppm.

**(*Z*)-1,4-Dihydroxytridec-2-ene 2c:**from **21b** asan *oil* (0.9 g; 85%), max (L) 3327, 1013 and 722 cm-1; H (300 MHz) 0.86 (3H, t, *J* 6.7, C*H3*), 1.24 (14H, m, C*H2* groups), 1.5 (2H, m, C*H2*), 3.47 (2H, br s, exch. D2O, O*H* groups), 4.01 (1H, ddd, *J* 13.1 5.0 and 0.9, HOC*H2a*CC), 4.29 (1H, ddd, *J*13.0, 8.0 and 1.1, HOC*H2b*CC), 4.4 (1H, apparent q, *J* 7.2, C*H*OH), 5.52 (1H, dd, *J*9.7 and 8.7, 11-*H*) and 5.7 (1H, m, 12-*H*) ppm; C (100.6 MHz) 134.9 and 129.6 (*C*=*C*), 67.4 (4-*C*), 58.2 (1-*C*H2), 37.2 (*C*H2), 31.8 (*C*H2), 29.56 (*C*H2), 29.53 (*C*H2), 29.26, (*C*H2), 29.23 (*C*H2), 25.3 (*C*H2), 22.6 (*C*H2) and 14.0 (*C*H3) ppm. [Found: C 72.83, H 12.15 %; C13H26O2 *requires* C 72.89, H 12.15 %]

**(*Z*)-2,5-Dihydroxy-1-phenylpent-3-ene****2d:**from **21c** asa solid33(0.82 g: 92%), m.p. 61.8-62.1 oC, max (N) 3363, 1605, 1074, 1023, 746 and 700 cm-1; H (300 MHz) 2.44 (2H, br s, exch. D2O, O*H* groups), 2.73 (1H, dd, *J*13.2 and 6.6, C*H2a*Ph), 2.89 (1H, dd, *J* 13.2 and 7.0, C*H2b*Ph), 3.74 (H, dd, *J* 13.0 and 5.8, HOC*H2a*CC), 4.05 (1H, dd, *J* 12.9 and 7.0, HOC*H2b*CC), 4.63 (1H, apparent q, *J* 7.1, C*H*OH), 5.54 (1H, dd, *J*11.5 and 9.0, 3-*H*) 5.65 (1H, m, 4-*H*) and 7.16-7.32 (5H, overlapping ms, Ar*H*) ppm; C (75.5 MHz**)** 137.4 (quaternary), 133.8 (*C*H), 130.3 (*C*H), 129.5 (C=C), 128.4 (*C*H), 126.5 (C=C), 68.7 (*C*H), 58.1 (*C*H2) and 43.7 (*C*H3) ppm; *m/z* (EI): 178.0997: *calculated for* C11H14O2 178.0994.

**(*Z*)-1,4-Dihydroxy-6-phenylhex-2-ene****2e:**from **21d** asan *oil* (0.84 g; 88%), max (L) 3343, 1605, 1030, 746 and 698 cm-1; H (300 MHz) 1.78 (1H, m, C*H2a*CH2Ph), 1.95 (1H, m, C*H2b*CH2Ph), 2.66 (2H, t, *J* 7.9, C*H2*Ph), 3.18 (2H, br s, exch. D2O, O*H* groups), 4.02 (1H, dd, *J* 12.9 and 6.4, HOC*H2a*CC), 4.22 (1H, dd, *J* 12.8 and 7.8, HOC*H2b*CC), 4.34 (1H, apparent q, *J* 7.0, C*H*OH), 5.54 (1H, apparent t, *J* 6.8, 2-*H*), 5.73 (1H, m, 3-H) and 7.23 (5H, m, Ar*H*) ppm; *m/z* (EI): 192.1144: *calculated for* C12H16O2 192.1150.

[*Found:* C 74.87, H 8.62 %; C12H16O2 *requires* C 75.00, H 8.33 %]
